# Supplementary material for: The Sequencing-Based Mapping Method for Effectively Cloning Plant Mutated Genes
Source: Int J Mol Sci. 2021 Jun 9;22(12):6224. doi: 10.3390/ijms22126224 (PMC8226582; doi:10.3390/ijms22126224)
Supplement: Supplementary file 1 [file ijms-22-06224-s001.zip]

Archive with 6 entries (6 files):
- Supplementary Figures -20210603.pdf
- Table S1. The preliminary analysis of the molecular markers in 275-3.xlsx
- Table S2. The analysis results of G value in ygs .xlsx
- Table S3. The preliminary analysis of the molecular markers in ygs.xlsx
- Table S4. The preliminary analysis of the molecular markers in abs.xlsx
- Table S5. The sequences of primers.xlsx
