# Supplementary material for: The Sequencing-Based Mapping Method for Effectively Cloning Plant Mutated Genes
Source: Int J Mol Sci. 2021 Jun 9;22(12):6224. doi: 10.3390/ijms22126224 (PMC8226582; doi:10.3390/ijms22126224)
Supplement: Supplementary file 1 [file ijms-22-06224-s001.zip › Table S1. The preliminary analysis of the molecular markers in 275-3.xlsx]

## Sheet: Sheet1
Table S4. The preliminary analysis of the molecular markers in 275-3
Makers	Chromosome	Start position	Marker index
T23J18	1	3830616	0
T22J18	1	8070981	0
F28H19	1	16533461	0
F19K23	1	22939031	0.3718
T17F3	1	26305380	0.3974
T23K3	2	388035	0.3205
T12H3	2	2584861	0.359
F3P11	2	8410147	0.4872
T20P8	2	11595846	0.4872
T16B24	2	16339214	0.4359
F20H23	3	989952	0
MGL6	3	5634662	0
K1G2	3	10162396	0
T32N15	3	16344066	0
T26I12	3	20475817	0
T4I9	4	1313034	0.3205
F17A8	4	6139784	0.2821
FCA8	4	9791410	0
T15N24	4	13413430	0
T4L20	4	16563643	0.2564
F13G24	5	2501873	0.2692
MYJ24	5	7720794	0.2692
T26D22	5	13588072	0
K6M13	5	20078535	0
MQB2	5	25191644	0.3333
