# Supplementary material for: The Sequencing-Based Mapping Method for Effectively Cloning Plant Mutated Genes
Source: Int J Mol Sci. 2021 Jun 9;22(12):6224. doi: 10.3390/ijms22126224 (PMC8226582; doi:10.3390/ijms22126224)
Supplement: Supplementary file 1 [file ijms-22-06224-s001.zip › Table S2. The analysis results of G value in ygs .xlsx]

## Sheet: YGS___HY_GStats_sig_annotation
Table S2. The analysis results of G value in ygs
Chromosome	Position	Refence (Ref)	Alternate (Alt)	HY_supported reads (Ref_Alt)	YGS_supported reads (Ref_Alt)	G_Value	Type	Gene	Start	End	Strand	GO	Function
Chr1	32969158	T	A	22_0	10_24	35.134	In	LOC_Os01g57073	32965305	32977407	+	molecular_function,GO:0004222,Putative insulin degrading enzyme;biological_process,GO:0006508,Putative insulin degrading enzyme;cellular_component,GO:0009536,Putative insulin degrading enzyme	zinc-metallopeptidase, peroxisomal
Chr1	33586823	A	G	249_0	146_103	169.769	UpStream	LOC_Os01g58048	33585501	33586432	-		Mitochondrion ORF162
Chr1	33586854	A	G	249_1	192_57	77.688	UpStream	LOC_Os01g58048	33585501	33586432	-		Mitochondrion ORF162
Chr1	33586858	A	G	249_1	195_53	71.476	UpStream	LOC_Os01g58048	33585501	33586432	-		Mitochondrion ORF162
Chr1	33586870	C	A	246_1	202_46	59.803	UpStream	LOC_Os01g58048	33585501	33586432	-		Mitochondrion ORF162
Chr1	33586872	T	A	245_0	209_41	59.473	UpStream	LOC_Os01g58048	33585501	33586432	-		Mitochondrion ORF162
Chr1	33586882	A	G	244_1	215_34	41.24	UpStream	LOC_Os01g58048	33585501	33586432	-		Mitochondrion ORF162
Chr1	33586886	A	T	245_0	218_31	44.351	UpStream	LOC_Os01g58048	33585501	33586432	-		Mitochondrion ORF162
Chr1	33586957	A	T	246_1	218_29	34.511	UpStream	LOC_Os01g58048	33585501	33586432	-		Mitochondrion ORF162
Chr1	33587001	G	T	245_4	205_43	41.354	UpStream	LOC_Os01g58048	33585501	33586432	-		Mitochondrion ORF162
Chr2	14246899	G	T	78_16	249_0	43.395	UpStream	LOC_Os02g24586	14247651	14248055	+		rice chloroplast ORF133; ORF within trnI intron
Chr2	14246903	G	T	98_15	250_0	36.309	UpStream	LOC_Os02g24586	14247651	14248055	+		rice chloroplast ORF133; ORF within trnI intron
Chr2	14269687	C	T	78_22	244_3	41.867	UpStream	LOC_Os02g24612	14270096	14270806	+		ribosomal protein S2 (plastid)
Chr2	14283716	G	A	21_0	28_48	34.269	DownStream	LOC_Os02g24628	14284410	14284598	-		photosystem II protein Z (plastid)
Chr2	14283736	T	C	20_4	24_221	60.992	DownStream	LOC_Os02g24628	14284410	14284598	-		photosystem II protein Z (plastid)
Chr2	14284177	T	A	14_3	21_135	35.138	DownStream	LOC_Os02g24628	14284410	14284598	-		photosystem II protein Z (plastid)
Chr2	14284177	T	A	14_3	21_135	35.138	DownStream	LOC_Os02g24632	14285072	14286627	-		rice chloroplast PSII 43kDa protein
Chr2	18956339	T	C	24_0	9_23	37.655	UpStream	LOC_Os02g32080	18956519	18957353	+	cellular_component,GO:0016020,Hypothetical protein OSJNBb0003H22.6;cellular_component,GO:0016020,Os02g0520500 protein;cellular_component,GO:0016020,Hypothetical protein;cellular_component,GO:0016023,Os02g0520500 protein;cellular_component,GO:0016023,Hypothetical protein OSJNBb0003H22.6;cellular_component,GO:0016023,Hypothetical protein	formin-like protein 10
Chr3	6715433	C	T	6_14	42_1	35.225	UpStream	LOC_Os03g12630	6716365	6720197	+	cellular_component,GO:0016020,Expressed protein	uncharacterized protein LOC4332133
Chr3	6715453	A	G	5_15	41_2	34.8	UpStream	LOC_Os03g12630	6716365	6720197	+	cellular_component,GO:0016020,Expressed protein	uncharacterized protein LOC4332133
Chr3	10311789	G	T	13_0	21_88	37.388	UpStream	LOC_Os03g18390	10312269	10313422	+	cellular_component,GO:0005739,Hypothetical protein;cellular_component,GO:0005739,Hypothetical protein	hypothetical protein LOC_Os03g18390
Chr3	27611968	T	C	180_0	121_128	177.748	UpStream	LOC_Os03g48471	27612176	27613959	+		ATP synthase alpha chain, putative
Chr3	27611995	G	T	84_2	83_138	111.678	UpStream	LOC_Os03g48471	27612176	27613959	+		ATP synthase alpha chain, putative
Chr3	27612017	C	A	33_1	50_125	62.408	UpStream	LOC_Os03g48471	27612176	27613959	+		ATP synthase alpha chain, putative
Chr3	31132966	G	A	27_0	15_26	36.459	In	LOC_Os03g54760	31130170	31133670	+	molecular_function,GO:0005488,36I5.1;cellular_component,GO:0005743,36I5.1;biological_process,GO:0006810,36I5.1	solute carrier family 25 member 44
Chr4	1075427	A	G	0_20	50_21	38.873	In	LOC_Os04g02780	1073401	1076455	+	molecular_function,GO:0004040,OSJNBa0020P07.1 protein	amidase 1
Chr4	6980213	T	A	28_0	3_16	43.552	UpStream	LOC_Os04g12600	6976835	6979249	-	molecular_function,GO:0004672,OSJNBb0005B05.8 protein;molecular_function,GO:0004674,OSJNBb0005B05.8 protein;molecular_function,GO:0004713,OSJNBb0005B05.8 protein;molecular_function,GO:0005524,OSJNBb0005B05.8 protein;molecular_function,GO:0005529,OSJNBb0005B05.8 protein;biological_process,GO:0006468,OSJNBb0005B05.8 protein;molecular_function,GO:0004674,H0512B01.12 protein;biological_process,GO:000…	G-type lectin S-receptor-like serine/threonine-protein kinase RLK1
Chr4	9124774	A	G	29_5	36_208	69.793	In	LOC_Os04g16740	9123602	9125252	+	molecular_function,GO:0005524,ATPase alpha subunit, 3'-partial;molecular_function,GO:0005524,ATPase alpha subunit, 3'-partial;molecular_function,GO:0005524,ATP synthase subunit alpha;biological_process,GO:0006754,ATP synthase subunit alpha;biological_process,GO:0006818,ATPase alpha subunit, 3'-partial;biological_process,GO:0015986,ATP synthase subunit alpha;cellular_component,GO:0016469,ATPase al…	ATP synthase CF1 alpha subunit (plastid)
Chr4	9124774	A	G	29_5	36_208	69.793	DownStream	LOC_Os04g16745	9125701	9126012	-		ribosomal protein S14 (plastid)
Chr4	9156057	G	A	23_0	58_168	56.553	DownStream	LOC_Os04g16824	9154785	9155504	+		ribosomal protein S3 (plastid)
Chr4	9156057	G	A	23_0	58_168	56.553	UpStream	LOC_Os04g16826	9156712	9157117	+		ribosomal protein L16 (chloroplast)
Chr4	9174657	C	T	35_26	35_212	45.349	In	LOC_Os04g16866	9174386	9175114	+		photosystem II protein K (plastid)
Chr4	12593871	G	A	26_0	8_22	40.088	In	LOC_Os04g22235	12593735	12594095	-
Chr5	3893484	T	A	16_0	29_85	38.25	DownStream	LOC_Os05g07320	3894309	3894988	-
Chr5	6316563	T	C	21_0	7_20	34.144	UpStream	LOC_Os05g11190	6316889	6318955	+	cellular_component,GO:0005739,Hypothetical protein P0708D12.8	hypothetical protein
Chr5	12958098	G	C	21_14	90_0	40.4	DownStream	LOC_Os05g22830	12953646	12957954	+	cellular_component,GO:0005739,Os05g0293600 protein	RNA polymerase beta
Chr5	12958100	G	A	26_15	96_0	40.643	DownStream	LOC_Os05g22830	12953646	12957954	+	cellular_component,GO:0005739,Os05g0293600 protein	RNA polymerase beta
Chr6	3541700	A	G	0_29	56_41	40.809	In	LOC_Os06g07360	3540812	3541834	+		hypothetical protein
Chr6	4558676	A	G	12_0	0_19	41.077	UpStream	LOC_Os06g09050	4556487	4558020	-	molecular_function,GO:0004970,Avr9/Cf-9 rapidly elicited protein-like;molecular_function,GO:0005215,Avr9/Cf-9 rapidly elicited protein-like;molecular_function,GO:0005234,Avr9/Cf-9 rapidly elicited protein-like;biological_process,GO:0006810,Avr9/Cf-9 rapidly elicited protein-like;cellular_component,GO:0016020,Avr9/Cf-9 rapidly elicited protein-like	Avr9/Cf-9 rapidly elicited protein-like
Chr6	4558676	A	G	12_0	0_19	41.077	In	LOC_Os06g09060	4558430	4563453	+		OSJNBb0069N01.1
Chr6	16741609	T	A	22_0	31_98	53.278	In	LOC_Os06g29310	16732924	16745662	-	biological_process,GO:0006508,Ulp1 protease-like;molecular_function,GO:0008234,Ulp1 protease-like	ubiquitin-like-specific protease 1D isoform X1
Chr6	16741615	A	G	20_0	32_110	51.64	In	LOC_Os06g29310	16732924	16745662	-	biological_process,GO:0006508,Ulp1 protease-like;molecular_function,GO:0008234,Ulp1 protease-like	ubiquitin-like-specific protease 1D isoform X1
Chr6	23573970	T	C	21_0	38_75	39.377	UpStream	LOC_Os06g39708	23572435	23573961	-		photosystem II 47kDa protein _ chloroplast
Chr6	23573970	T	C	21_0	38_75	39.377	UpStream	LOC_Os06g39712	23574363	23575246	+		ATP-dependent Clp protease proteolytic subunit (chloroplast)
Chr6	23584739	T	C	17_0	26_73	38.797	In	LOC_Os06g39744	23584498	23585055	-		photosystem I assembly protein Ycf4 (plastid)
Chr6	23585695	C	T	241_7	198_46	36.286	UpStream	LOC_Os06g39744	23584498	23585055	-		photosystem I assembly protein Ycf4 (plastid)
Chr6	23585695	C	T	241_7	198_46	36.286	DownStream	LOC_Os06g39748	23585866	23586186	-		acetyl-CoA carboxylase beta subunit (plastid)
Chr6	23585695	C	T	241_7	198_46	36.286	DownStream	LOC_Os06g39752	23586381	23586782	-		hypothetical protein OrsajCp035 (plastid)
Chr6	23585721	T	A	242_1	189_59	79.489	UpStream	LOC_Os06g39744	23584498	23585055	-		photosystem I assembly protein Ycf4 (plastid)
Chr6	23585721	T	A	242_1	189_59	79.489	DownStream	LOC_Os06g39748	23585866	23586186	-		acetyl-CoA carboxylase beta subunit (plastid)
Chr6	23585721	T	A	242_1	189_59	79.489	DownStream	LOC_Os06g39752	23586381	23586782	-		hypothetical protein OrsajCp035 (plastid)
Chr6	23587348	T	TC	13_11	10_194	36.198	UpStream	LOC_Os06g39752	23586381	23586782	-		hypothetical protein OrsajCp035 (plastid)
Chr6	28403940	G	T	27_3	17_67	47.931	In	LOC_Os06g46770	28401731	28404585	+		polyubiquitin isoform X2
Chr7	5202566	C	T	0_18	40_13	38.073	In	LOC_Os07g09770	5202317	5206976	-		retrotransposon protein, putative, unclassified, expressed
Chr7	21159183	T	C	0_9	28_0	40.753	UpStream	LOC_Os07g35370	21155350	21158796	-	molecular_function,GO:0004672,Putative serine/threonine-specific protein kinase;molecular_function,GO:0004674,Putative serine/threonine-specific protein kinase;molecular_function,GO:0004713,Putative serine/threonine-specific protein kinase;molecular_function,GO:0005524,Putative serine/threonine-specific protein kinase;biological_process,GO:0006468,Putative serine/threonine-specific protein kinase	cysteine-rich receptor-like protein kinase 15
Chr8	6698959	T	A	12_15	64_0	44.208	UpStream	LOC_Os08g11420	6699126	6699891	+		retrotransposon protein, putative, Ty3-gypsy subclass
Chr8	14802397	G	A	0_19	46_10	47.371	UpStream	LOC_Os08g24510	14803202	14803417	+		Os08g0333800
Chr8	16720279	C	T	11_4	0_35	35.14	UpStream	LOC_Os08g27390	16720811	16721305	+		hypothetical protein LOC_Os03g33920
Chr9	10215688	T	A	19_0	5_20	35.457	In	LOC_Os09g16680	10215247	10217268	+		putative polyprotein
Chr9	16231014	G	T	14_0	10_45	36.849	In	LOC_Os09g26710	16229909	16231065	-	cellular_component,GO:0009536,Hypothetical protein;cellular_component,GO:0005739,Hypothetical protein P0556H01.14	hypothetical protein
Chr10	10811064	C	A	14_0	17_102	46.664	UpStream	LOC_Os10g21194	10808862	10810490	-		Hypothetical protein ORF542 from chromosome 10 chloroplast insertion
Chr10	10811064	C	A	14_0	17_102	46.664	DownStream	LOC_Os10g21196	10811681	10812748	-		ribosomal protein S16 (plastid)
Chr10	19033967	G	A	25_0	11_23	35.94	DownStream	LOC_Os10g35570	19028120	19033623	+	cellular_component,GO:0016023,Os10g0498800 protein;cellular_component,GO:0009536,Hypothetical protein OSJNBa0078O01.3	trafficking protein particle complex subunit 13
Chr10	19033967	G	A	25_0	11_23	35.94	In	LOC_Os10g35580	19033885	19036321	-		microtubule-associated protein RP/EB family member 1C
Chr10	20467406	A	G	25_63	5_243	48.222	UpStream	LOC_Os10g38214	20468369	20468974	+		ribosomal protein S4 (plastid)
Chr10	22453263	G	A	2_10	47_0	42.732	In	LOC_Os10g41710	22453063	22456636	+	molecular_function,GO:0051082,Chloroplast chaperonin 10, putative, expressed;cellular_component,GO:0009536,Os10g0566700 protein;cellular_component,GO:0009536,Chloroplast chaperonin 10, putative, expressed;cellular_component,GO:0009536,Putative chloroplast chaperonin	10 kDa chaperonin
Chr10	22453269	A	G	2_8	47_0	36.08	In	LOC_Os10g41710	22453063	22456636	+	molecular_function,GO:0051082,Chloroplast chaperonin 10, putative, expressed;cellular_component,GO:0009536,Os10g0566700 protein;cellular_component,GO:0009536,Chloroplast chaperonin 10, putative, expressed;cellular_component,GO:0009536,Putative chloroplast chaperonin	10 kDa chaperonin
Chr11	21607237	C	CAAACCTT	0_15	46_10	39.411	DownStream	LOC_Os11g36610	21608163	21609671	-		F-box domain containing protein, expressed
Chr11	28818092	C	T	0_19	34_11	38.261	UpStream	LOC_Os11g47790	28818463	28820221	+	cellular_component,GO:0005739,Hypothetical protein	hypothetical protein
Chr11	28934693	C	G	11_0	13_89	38.882	In	LOC_Os11g47970	28934294	28936340	-	molecular_function,GO:0003700,Ribulose-1,5-bisphosphate carboxylase activase;cellular_component,GO:0005634,Ribulose-1,5-bisphosphate carboxylase activase;biological_process,GO:0006355,Ribulose-1,5-bisphosphate carboxylase activase	RuBisCO activase small isoform precursor
Chr11	28934701	G	C	13_0	16_83	40.372	In	LOC_Os11g47970	28934294	28936340	-	molecular_function,GO:0003700,Ribulose-1,5-bisphosphate carboxylase activase;cellular_component,GO:0005634,Ribulose-1,5-bisphosphate carboxylase activase;biological_process,GO:0006355,Ribulose-1,5-bisphosphate carboxylase activase	RuBisCO activase small isoform precursor
Chr11	28934703	T	A	13_0	16_83	40.372	In	LOC_Os11g47970	28934294	28936340	-	molecular_function,GO:0003700,Ribulose-1,5-bisphosphate carboxylase activase;cellular_component,GO:0005634,Ribulose-1,5-bisphosphate carboxylase activase;biological_process,GO:0006355,Ribulose-1,5-bisphosphate carboxylase activase	RuBisCO activase small isoform precursor
Chr12	692824	T	C	16_0	0_20	49.15	DownStream	LOC_Os12g02220	691573	691998	+	cellular_component,GO:0016023,Zinc finger, C3HC4 type family protein;cellular_component,GO:0016023,Hypothetical protein	RING-H2 finger protein ATL56-like
Chr12	692824	T	C	16_0	0_20	49.15	In	LOC_Os12g02230	692719	694659	+		uncharacterized protein LOC4351309 isoform X1
Chr12	789654	C	A	23_0	0_30	72.219	In	LOC_Os12g02400	789403	790687	-		probable WRKY transcription factor 69 isoform X1
Chr12	1070537	T	G	13_0	3_29	38.507	In	LOC_Os12g02910	1069974	1075419	-		hypothetical protein OsI_37298
Chr12	1171312	A	T	19_0	4_39	54.997	UpStream	LOC_Os12g03090	1169472	1170473	-		40S ribosomal protein S16
Chr12	1171312	A	T	19_0	4_39	54.997	In	LOC_Os12g03094	1170641	1172382	+
Chr12	2320989	A	G	27_0	3_33	66.376	In	LOC_Os12g05230	2318842	2321840	+	cellular_component,GO:0009536,ATP-dependent RNA helicase, putative, expressed	DEAD-box ATP-dependent RNA helicase 52B-like
Chr12	8575131	T	C	22_0	15_32	36.268	In	LOC_Os12g15010	8574459	8577704	+		retrotransposon protein, putative, Ty1-copia subclass
Chr12	11263055	C	G	13_0	13_53	34.451	In	LOC_Os12g19381	11262563	11278448	+	cellular_component,GO:0009573,Ribulose 1,5-bisphosphate carboxylase small subunit;cellular_component,GO:0009573,Ribulose 1,5-bisphosphate carboxylase small subunit;biological_process,GO:0015977,Ribulose 1,5-bisphosphate carboxylase small subunit;biological_process,GO:0015977,Ribulose 1,5-bisphosphate carboxylase small subunit;molecular_function,GO:0016984,Ribulose 1,5-bisphosphate carboxylase sma…	ribulose bisphosphate carboxylase small chain A, chloroplastic
Chr12	20504010	G	C	21_117	241_1	340.159	In	LOC_Os12g33958	20503266	20509254	+		unnamed protein product
Chr12	23400663	A	G	0_29	38_22	42.453	DownStream	LOC_Os12g38100	23399038	23399863	+	cellular_component,GO:0016020,Expressed protein;cellular_component,GO:0016020,Hypothetical protein	CASP-like protein 4C1
