# Supplementary material for: The Sequencing-Based Mapping Method for Effectively Cloning Plant Mutated Genes
Source: Int J Mol Sci. 2021 Jun 9;22(12):6224. doi: 10.3390/ijms22126224 (PMC8226582; doi:10.3390/ijms22126224)
Supplement: Supplementary file 1 [file ijms-22-06224-s001.zip › Table S3. The preliminary analysis of the molecular markers in ygs.xlsx]

## Sheet: Sheet1
Table S3. The preliminary analysis of the molecular markers in ygs
Chromosome	SSR marker	Location	Marker-index
Chr1	RM8146	4,908,238 bp	0.3571
	RM562	14,626,568 bp	0.5714
	RM488	24,807,684 bp	0.5714
	RM1003	33,476,035 bp	0.5
Chr2	RM561	19,548,504 bp	0.5
	RM3515	24,016,748 bp	0.5714
	RM530	30,532,386 bp	0.3571
	RM535	35,778,527 bp	0.5
Chr3	RM218	8,405,516 bp	0.6428
	RM6929	12,928,444 bp	0.4286
Chr4	RM335	688,466 bp	0.5
	RM518	2,030,305 bp	0.5
	RM2275	34,320,671 bp	0.7143
Chr5	RM413	2,212,814 bp	0.5714
	RM5700	4,378,362 bp	0.6429
	RM4691	7,026,313 bp	0.4286
Chr6	RM204	3,168,547 bp	0.6429
	RM5745	12,493,198 bp	0.6429
	RM3187	20,926,044 bp	0.6429
	RM3509	30,971,169 bp	0.3571
Chr7	RM5490	2,098,953 bp	0.4246
	RM5499	9,987,338 bp	0.5714
	RM560	19,583,222 bp	0.4246
	RM505	25,188,164 bp	0.2857
Chr8	RM3395	10,293,949 bp	0.6429
	RM8271	7,617,315 bp	0.6429
	RM331	12,294,755 bp	0.6429
Chr9	RM105	13,150,492 bp	0.5
	RM5122	15,248,365 bp	0.2857
Chr10	RM7361	1,921,864 bp	0.3571
Chr11	RM5590	11,683,174 bp	0.5
	RM5997	22,710,614 bp	0.6429
	RM224	29,516,287 bp	0.6429
Chr12	RM1080	906,291 bp	0.9286
	RM519	19,932,442 bp	0.5
	RM5851	26,186,010 bp	0.3571
