# Supplementary material for: The Sequencing-Based Mapping Method for Effectively Cloning Plant Mutated Genes
Source: Int J Mol Sci. 2021 Jun 9;22(12):6224. doi: 10.3390/ijms22126224 (PMC8226582; doi:10.3390/ijms22126224)
Supplement: Supplementary file 1 [file ijms-22-06224-s001.zip › Table S4. The preliminary analysis of the molecular markers in abs.xlsx]

## Sheet: Sheet1
Table S4. The preliminary analysis of the molecular markers in abs
Chromosome	SSR marker	Location	Marker-index
Chr1	RM8146	4,908,238 bp	0.4615
	RM562	14,626,568 bp	0.4647
	RM488	24,807,684 bp	0.5333
	RM1003	33,476,035 bp	0.4
Chr2	RM561	19,548,504 bp	0.5833
	RM3515	24,016,748 bp	0.4667
	RM530	30,532,386 bp	0.4333
	RM535	35,778,527 bp	0.6
Chr3	RM218	8,405,516 bp	0.4833
	RM6929	12,928,444 bp	0.4333
Chr4	RM335	688,466 bp	0.5333
	RM518	2,030,305 bp	0.55
	RM2275	34,320,671 bp	0.5167
Chr5	RM413	2,212,814 bp	0.4333
	RM5700	4,378,362 bp	0.4333
	RM4691	7,026,313 bp	0.5
Chr6	RM204	3,168,547 bp	0.55
	RM5745	12,493,198 bp	0.5167
	RM3187	20,926,044 bp	0.55
	RM3509	30,971,169 bp	0.5
Chr7	RM5490	2,098,953 bp	0.5333
	RM5499	9,987,338 bp	0.4667
	RM560	19,583,222 bp	0.45
	RM505	25,188,164 bp	0.5167
Chr8	RM3395	10,293,949 bp	0.4667
	RM8271	7,617,315 bp	0.4667
	RM331	12,294,755 bp	0.4667
Chr9	RM105	13,150,492 bp	0.4833
	RM5122	15,248,365 bp	0.4833
Chr10	RM7361	1,921,864 bp	0.55
Chr11	RM5590	11,683,174 bp	0.45
	RM229	18,407,879 bp	0.3667
	RM5997	22,710,614 bp	0.5
	RM224	29,516,287 bp	0.5333
Chr12	RM1880	747,262 bp	0.7333
	RM1080	906,291 bp	0.7333	The candidate region
	RM519	19,932,442 bp	0.6333
	RM5851	26,186,010 bp	0.5667
