# Supplementary material for: The Sequencing-Based Mapping Method for Effectively Cloning Plant Mutated Genes
Source: Int J Mol Sci. 2021 Jun 9;22(12):6224. doi: 10.3390/ijms22126224 (PMC8226582; doi:10.3390/ijms22126224)
Supplement: Supplementary file 1 [file ijms-22-06224-s001.zip › Table S5. The sequences of primers.xlsx]

## Sheet: Sheet1
Table S5. The sequences of primers
For the mutant 275-3
Gene	Forward	Reverse
T23J18	GATATTTGTTTTGCTAACAC	TAATAAAGTTCCAGCTTTGA
T22J18	CACTGCAACAAAGTGGAAAT	ATCCGTTTCAATATCCACAA
F28H19	TGCGGGAGTGTGATAGAATA	TCCTCGAAAGATTCATTGAT
F19K23	GAATTCTGTAACATCCCATTTCC	GGTCTAATTGCCGTTGTTGC
T17F3	GGACCGACGGTTACGAGAGT	TAACGGGCCGTTGCAAGA
T23K3	CGTGTTTACCGGGTCGGA	AAAACCCTTGAAGAATACG
T12H3	TAGTCTGAGCTTACCAATA	TTACCCTCGACTCGTAAC
F3P11	ATGTATTTGTTGCAAAATAA	TGCACAGAAGAAAAAACTA
T20P8	TCCGATTCGATTAAACTC	TTATTTCCTATTTCAAGACT
T16B24	ATGAACGGAGTAGCTATC	CGCGTAGAACATAATCTGTA
F20H23	CAATGGGAAGAAGGTGTGAG	CGCATTTCCATAAGTTTGTT
MGL6	ACCTGTTCAGTCTATGTTAC	GGGAATTATTAACATTATCA
K1G2	ATGAGCTTTAGGAGTGTGTA	AATTTTGTCCCAAAAGAATA
T32N15	CAAAAGAAATGCAACGAGAC	TTTGATCATGAATGGTAGTG
T26I12	GAGCAACATTAAGGATAGAA	ATCTCATACTCATAATATGTAG
T4I9	TTATAGCAAACGTACAAGTC	CTGCATACACGTCGTCTC
F17A8	CTGGACCCTAGTGGATGT	GACGGTTCTCCATTAATTAT
FCA8	TTCGGAGAAAGAAACGACAT	ATGGAACTATTCAGGCATTA
T15N24	GCAACCGCTGCTGCTTTA	AATATTTGGCTTTGCGTAGA
T4L20	ACCCTAAAACAATGTCTCTT	TGCTAACATGGAAATTTGTC
F13G24	TTATGCCCATTTGAAACC	TGAAACTTTGGGCCTCAG
MYJ24	TTCATGAGAGCGGCATTC	GCAAAATGTTTGGACAATTA
T26D22	CACAGGCCATTGGATGTA	TGTTAGAACCCACCATTTG
K6M13	CCTGTTCCAATGAATATG	TGTAGCTGCTGAGTTGTC
F27L4	TTATGTTGTGTTGGAGTTGG	TTGGTATGAATACGTTCTAA
T19L18	AGTTTGGACATTGGAATA	ACTCTAAACCAAAAATTAAG
T28I24	ATAGGCATTATAGTTATGAG	TTTCGACATTGGCTTGAA
F27A10	GGGTCTGAATGGAAGAAC	GTAGGACAAAACCAAGTACA
T9J22	GCGACAATGGCACTACAC	CTTCCATCGCTCTGTCAC
F12C20	TCCTTTGTCGTCTTGTTG	ATTTTAACGAAAAATATTAC
275-3	ATGCAGTCTGGTGAAGAATA	CACTGGCAATAATGTCGTCC
T22F11	CGTGGATTAGAGATCACT	TTTGAATTTCTTCTAAGAG
MQB2	AAAAGGCGACTACTAGCA	GCCATTTATTTGGTCAAC
For the mutant ygs and abs
Gene	Forward	Reverse
RM8146	AGCAGCGCCAGTGTGAGAACC	CCATTCTGCTTCGAGGATGAAACC
RM562	GGAAAGGAAGAATCAGACACAGAGC	GTACCGTTCCTTTCGTCACTTCC
RM488	AACAACCAGCGTATGCGTTCTCG	CCCACGGCTTTGTAGGAAGAAGC
RM561	GAGCTGTTTTGGACTACGGC	GAGTAGCTTTCTCCCACCCC
RM3688	GTTGAATCAAGCTGTGCAGC	AGCTAGGCAAAGCATGCATG
RM1003	TTCCAGCTTTGCATGAACAACG	TGTACGCGACCCTGATGTCC
RM3515	CATGCTAGTAAGCAAAGGGCAACG	TTGCACGTCCAACTGTCCAAGC
RM530	TTCTTTATTCCCTCGCACTGACC	CAATGATGCCACAAACCGTAACC
RM535	CGGAGTGAATGAGTTTGCTCTGC	GTCATAACCCTACCTCCCGTAATCC
RM218	TCAAACCAAGGTCCTTCAACTGC	TTTCTTCCACCGTCCATGTATCC
RM6929	TTCTTTCGAGGGTACGTAGAGG	CTAGCTAGCCAGTAGCTGATCG
RM335	GTACACACCCACATCGAGAAGC	TCCATGGATATACGAGGAGATGC
RM518	AAGACACAAGCAAACAGCTCAACC	AAGCTTGCTTGGTTCAAGAGAGG
RM2275	GAAGCCAGGTTACCAAGTAAACG	GGATACGCGATACTGGTACGG
RM5709	TTTGGGATAAATGGGAGAGG	TCAGCTGGTTATTATGGAGAGG
RM413	CCAATCTTGTCTTCCGGATCTTGC	AGATAGCCATGGGCGATTCTTGG
RM5700	TTTCAGTGCATGTCTTCG	GATTGTATGCATGGTTCAAAG
RM4691	CCATCAAGAGATAGTGCTCCAACC	ACACAGCCTATGTTTAGGGTTTCC
RM204	CTAGCTAGCCATGCTCTCGTACC	CTGTGACTGACTTGGTCATAGGG
RM5745	TAATGCCAAGTGGACGATGTACG	TGGTTGATATGTAGGCCTTCTGG
RM3187	GCGGCTCTACGAGCTCCTCTACTGG	GAGCTTTGTCAGCGGATTTGTTCG
RM3509	CATCCTCAAGGATCGTAGAATTGC	GAGTAGGTGCACGGGTTGAGG
RM5490	GCGGTGTGATTTGAATTGAACTGG	GCAAAGCAACTTCAAAGCTTCTCG
RM5499	GGACGAAAGGGTATTTGATTGG	CCTCAAGGTGGTCTCCTTCTCC
RM560	ATTTGGATGTCATCGCCAAGG	CCTGATTCGGTGAACACATAAAGC
RM505	AGAGTTATGAGCCGGGTGTG	GATTTGGCGATCTTAGCAGC
RM336	GTATCTTACAGAGAAACGGCATCG	GGTTTGTTTCAGGTTCGTCTATCC
RM3395	CTTGGGAAACTTCACCTCATGG	CTGAGAGAAGCCACAGGATTAATGG
RM8271	AGCAGCTCCGATTGTGTTAGCC	AATGGCGTCTGTGGTACTTTGC
RM331	ATGTTGCACTCCTTCAATGTCC	CATGAGACAATGCCAGAAAGC
RM105	GTCGTCGACCCATCGGAGCCAC	TGGTCGAGGTGGGGATCGGGTC
RM5122	ATATCACTGGGCAGACGGAGAGC	ACAGCCCACAGATCACAACAGC
RM7361	GAACGAGAGAGATCGAGAGGATACG	TTTCTCCGGTTAACGTGGAAGC
RM5590	GAGGGAGGGAGTACATATCTGATCG	AGCAACTGGATAAGCGATTGAGG
RM229	CACTCACACGAACGACTGAC	CGCAGGTTCTTGTGAAATGT
RM5997	CCTCGGTTGAGCAAATCAATCC	AGCTAACTAAACCGCCGTTCTCC
RM224	ATCGATCGATCTTCACGAGG	TGCTATAAAAGGCATTCGGG
RM1880	TCACCAGGGTCGTTAAAGTACTGC	GCAATACCACATCTGATCCACACC
RM519	AATTTCCGCGAAATCAGCATCC	TCATCTGGACAGTCGAGGTACGC
RM5851	GCTGTCGGGGATGTAATACG	GCTTTGCGGCTGGTTAATTG
RM1080	GGATGTGTGGTCGTGAATCTCC	GAGACGAAGAAGACGACGAGAGG
InDel 1	CCCCGCCTCTCATTTTCCG	CCGCATTCAAATTAACATATA
InDel 2	ATTCATGTAAAACTAAACT	GCCAAGGCCAAAGCGGACT
InDel 3	AAGAGTTTTCATATGGGCAT	CATGTTTTGGGTATCTAC
InDel 4	AAAACAGAAGTGAAAATA	AAGGACGGGGGGAGTAGA
RM27694	ACGTGCATTACGAGCAGACTGG	TGCGTGACTCTACCAAGTGTATGG
RM27697	TGAATCCACACTCGCAGATCG	AAATCAGCTCGGAGGGAACAGC
RM27715	TAGAAGAAACCGGAGGGAAGTGC	TGGGTTAGGTTAGGTGGGATGG
RM27818	GCAACTATTACAGTGACGCTTTGC	GTGAGGCATTTCCTGATATGATCG
abs-complement	GGGGTACCAGGGAGACGATCCTGACCGA	CGGACTAGTCAGCCATGTACGTGTCCGCA
RM27618	TGCATGGTCAACCATATGAAGC	TTTCACATCCCAGACGAGAGG
